# Supplementary material for: Socio-Demographic, Lifestyle, and Cardiometabolic Characteristics Associated with Low-Grade Systemic Inflammation in Russian Adult Population
Source: MDPI journal article supplement (doi:10.3390/biom13050835), 2023-05-14
Supplement: s1 [file s1]

## Supplementary Materials

**Table S1.** Summary statistics of high-sensitivity C-reactive protein levels (mg/L) in the study population by age and sex

|                           | Men |      |        |      |      | Women |      |        |      |      |
|---------------------------|-----|------|--------|------|------|-------|------|--------|------|------|
|                           | N   | M    | Me     | Q1   | Q3   | N     | M    | Me     | Q1   | Q3   |
| Age, years                |     |      |        |      |      |       |      |        |      |      |
| - 35-39                   | 92  | 2.80 | 1.33   | 0.84 | 2.65 | 133   | 2.10 | 0.93   | 0.40 | 2.64 |
| - 40-44                   | 134 | 3.31 | 1.27   | 0.58 | 2.33 | 207   | 2.34 | 1.07   | 0.49 | 2.97 |
| - 45-49                   | 134 | 3.05 | 1.10   | 0.61 | 2.86 | 189   | 2.44 | 1.12   | 0.44 | 2.44 |
| - 50-54                   | 161 | 3.57 | 1.76   | 0.87 | 3.57 | 188   | 2.90 | 1.51   | 0.66 | 3.54 |
| - 55-59                   | 151 | 3.66 | 1.68   | 0.88 | 3.65 | 215   | 3.54 | 1.99   | 0.81 | 3.72 |
| - 60-64                   | 161 | 4.47 | 1.86   | 1.07 | 3.48 | 202   | 3.69 | 2.16   | 1.15 | 4.96 |
| - 65-69                   | 154 | 5.84 | 2.24   | 1.13 | 5.10 | 249   | 4.28 | 1.93   | 0.93 | 4.04 |
| <i>p-value for trend*</i> |     |      | <0.001 |      |      |       |      | <0.001 |      |      |
| Total                     | 987 | 3.91 | 1.65   | 0.79 | 3.56 | 1383  | 3.14 | 1.50   | 0.64 | 3.54 |

\* Jonckheere-Terpstra test for trend.

**Table S2.** Proportions of the study participants with low-grade systemic inflammation by age and sex

|                           | Men |     |                     | Women |     |                     |
|---------------------------|-----|-----|---------------------|-------|-----|---------------------|
|                           | N   | Abs | Proportion (95% CI) | N     | Abs | Proportion (95% CI) |
| Age, years                |     |     |                     |       |     |                     |
| - 35-39                   | 92  | 28  | 30.4 (21.9; 40.6)   | 133   | 35  | 26.3 (19.5; 34.5)   |
| - 40-44                   | 134 | 32  | 23.9 (17.4; 31.8)   | 207   | 60  | 29.0 (23.2; 35.5)   |
| - 45-49                   | 134 | 41  | 30.6 (23.4; 38.9)   | 189   | 59  | 31.2 (25.0; 38.2)   |
| - 50-54                   | 161 | 56  | 34.8 (27.8; 42.5)   | 188   | 69  | 36.7 (30.1; 43.8)   |
| - 55-59                   | 151 | 48  | 31.8 (24.9; 39.6)   | 215   | 96  | 44.7 (38.1; 51.4)   |
| - 60-64                   | 161 | 63  | 39.1 (31.9; 46.9)   | 202   | 86  | 42.6 (35.9; 49.5)   |
| - 65-69                   | 154 | 63  | 40.9 (33.4; 48.8)   | 249   | 94  | 37.8 (31.9; 43.9)   |
| <i>p-value for trend*</i> |     |     | 0.002               |       |     | <0.001              |
| Total                     | 987 | 331 | 33.5 (30.7; 36.5)   | 1383  | 499 | 36.1 (33.6; 38.7)   |

\* Cochran–Armitage test for trend.

**Table S3.** Medication for dyslipidemia, hypertension, and diabetes self-reported by men and women with and without low-grade systemic inflammation (N=2054)

|                   | Men        |            | <i>p-value*</i> | Women      |            | <i>p-value*</i> |
|-------------------|------------|------------|-----------------|------------|------------|-----------------|
|                   | LGSI-      | LGSI+      |                 | LGSI-      | LGSI+      |                 |
| N                 | 546        | 308        |                 | 752        | 448        |                 |
|                   | Abs (%)    |            |                 | Abs (%)    |            |                 |
| Statins           | 49 (9.0)   | 39 (12.7)  | 0.089           | 76 (10.1)  | 42 (9.4)   | 0.681           |
| Antihypertensives | 177 (32.4) | 137 (44.5) | <0.001          | 251 (33.4) | 225 (50.2) | <0.001          |
| Antidiabetics     | 18 (3.3)   | 15 (4.9)   | 0.252           | 38 (5.1)   | 34 (7.6)   | 0.074           |

LGSI, low-grade systemic inflammation; LGSI+, LGSI-positive participants; LGSI-, LGSI-negative participants.\* Pearson's chi-squared test.

**Table S4.** Cardiovascular and pulmonary diseases self-reported by men and women with and without low-grade systemic inflammation (N=2054)

|                                | Men       |           | p-value* | Women     |           | p-value* |
|--------------------------------|-----------|-----------|----------|-----------|-----------|----------|
|                                | LGSI-     | LGSI+     |          | LGSI-     | LGSI+     |          |
| N                              | 546       | 308       |          | 752       | 448       |          |
|                                | Abs (%)   |           |          | Abs (%)   |           |          |
| <i>Cardiovascular diseases</i> |           |           |          |           |           |          |
| Coronary heart disease, angina | 61 (11.2) | 57 (18.5) | 0.003    | 86 (11.4) | 91 (20.3) | <0.001   |
| Myocardial infarction          | 28 (5.1)  | 36 (11.7) | <0.001   | 30 (4.0)  | 19 (4.2)  | 0.831    |
| Stroke                         | 16 (2.9)  | 19 (6.2)  | 0.022    | 19 (2.5)  | 16 (3.6)  | 0.298    |
| Heart failure                  | 35 (6.4)  | 40 (13.0) | 0.001    | 80 (10.6) | 68 (15.2) | 0.021    |
| Atrial fibrillation            | 8 (1.5)   | 4 (1.3)   | 0.843    | 13 (1.7)  | 9 (2.0)   | 0.726    |
| Heart surgery <sup>a</sup>     | 19 (3.5)  | 24 (7.8)  | 0.006    | 2 (0.3)   | 3 (0.7)   | 0.294    |
| <i>Pulmonary diseases</i>      |           |           |          |           |           |          |
| Chronic bronchitis or COPD     | 37 (6.8)  | 31 (10.1) | 0.088    | 93 (12.4) | 73 (16.3) | 0.057    |
| Bronchial asthma               | 21 (3.9)  | 11 (3.6)  | 0.839    | 40 (5.3)  | 55 (12.3) | <0.001   |

LGSI, low-grade systemic inflammation; LGSI+, LGSI-positive participants; LGSI-, LGSI-negative participants. <sup>a</sup> Percutaneous coronary intervention or coronary bypass surgery. \* Pearson's chi-squared test.
